# Supplementary material for: Binding of Gtf2i-β/δ transcription factors to the ARMS2 gene leads to increased circulating HTRA1 in AMD patients and in vitro
Source: PubMed Central journal article supplement (PMC8039566; doi:10.1016/j.jbc.2021.100456), 2021-02-24

**Identification of Gtf2i- $\beta/\delta$  transcription binding factors to the *ARMS2* insertion/deletion leads to systemic upregulation of HTRA1 levels in blood resulting in AMD**

Yang Pan <sup>1</sup>, Daisuke Iejima <sup>1</sup>, Mao Nakayama <sup>1</sup>, Akiko Suga <sup>1</sup>, Toru Noda <sup>2</sup>, Inderjeet Kaur <sup>3</sup>, Taraprasad Das <sup>3</sup>, Subhabrata Chakrabarti <sup>3</sup>, Robyn H. Guymer <sup>4,6</sup>, Margaret M. DeAngelis <sup>5</sup>, Megumi Yamamoto <sup>1,7</sup>, Paul N. Baird <sup>6\*</sup>, Takeshi Iwata <sup>1\*#</sup>

# Supplementary Figure 1

**a**

| Matrix ID | Name     | Score     | Relative score | Sequence ID | Start | End | Strand | Predicted sequence |
|-----------|----------|-----------|----------------|-------------|-------|-----|--------|--------------------|
| MA0099.3  | FOS::JUN | 4.82266   | 0.7913389      | EU427539.1  | 9     | 18  | -      | ATTAATAACC         |
| MA0099.3  | FOS::JUN | 2.76155   | 0.75145164     | EU427539.1  | 10    | 19  | +      | GTTATTAATT         |
| MA0099.3  | FOS::JUN | -0.178367 | 0.6945573      | EU427539.1  | 17    | 26  | +      | ATTAATTAAC         |
| MA0099.3  | FOS::JUN | -0.214463 | 0.69385875     | EU427539.1  | 36    | 45  | +      | ATTATTTAGT         |
| MA0099.3  | FOS::JUN | -1.43122  | 0.67031168     | EU427539.1  | 13    | 22  | +      | ATTAATTAAT         |
| MA0099.3  | FOS::JUN | -1.43122  | 0.67031168     | EU427539.1  | 13    | 22  | -      | ATTAATTAAT         |
| MA0099.3  | FOS::JUN | -1.48229  | 0.66932326     | EU427539.1  | 35    | 44  | -      | CTAAATAATT         |
| MA0099.3  | FOS::JUN | -1.86473  | 0.66192231     | EU427539.1  | 49    | 58  | -      | GTTAATTAATA        |
| MA0099.3  | FOS::JUN | -2.05962  | 0.65815065     | EU427539.1  | 21    | 30  | -      | TTTAGTTAAT         |
| MA0099.3  | FOS::JUN | -2.05962  | 0.65815065     | EU427539.1  | 40    | 49  | +      | TTTAGTTAAT         |
| MA0099.3  | FOS::JUN | -2.05962  | 0.65815065     | EU427539.1  | 53    | 62  | -      | TTTAGTTAAT         |
| MA0099.3  | FOS::JUN | -2.52077  | 0.64922623     | EU427539.1  | 12    | 21  | -      | TTAATTAATA         |
| MA0099.3  | FOS::JUN | -2.61048  | 0.64749029     | EU427539.1  | 17    | 26  | -      | GTTAATTAAT         |
| MA0099.3  | FOS::JUN | -3.07328  | 0.63853402     | EU427539.1  | 65    | 74  | -      | CTCACCCATT         |
| MA0099.3  | FOS::JUN | -3.26652  | 0.63479421     | EU427539.1  | 14    | 23  | +      | TTAATTAATT         |
| MA0099.3  | FOS::JUN | -3.26652  | 0.63479421     | EU427539.1  | 16    | 25  | -      | TTAATTAATT         |
| MA0099.3  | FOS::JUN | -3.82483  | 0.62398961     | EU427539.1  | 49    | 58  | +      | TTTAATTAAC         |
| MA0099.3  | FOS::JUN | -4.11021  | 0.61846697     | EU427539.1  | 18    | 27  | +      | TTAATTAACT         |
| MA0099.3  | FOS::JUN | -4.11021  | 0.61846697     | EU427539.1  | 50    | 59  | +      | TTAATTAACT         |
| MA0099.3  | FOS::JUN | -4.46461  | 0.61160853     | EU427539.1  | 32    | 41  | +      | TTAAATTATT         |
| MA0099.3  | FOS::JUN | -4.58575  | 0.60926401     | EU427539.1  | 54    | 63  | +      | TTACTAAAC          |
| MA0099.3  | FOS::JUN | -4.78834  | 0.60534355     | EU427539.1  | 58    | 67  | -      | ATTAGTTTAG         |

**b**

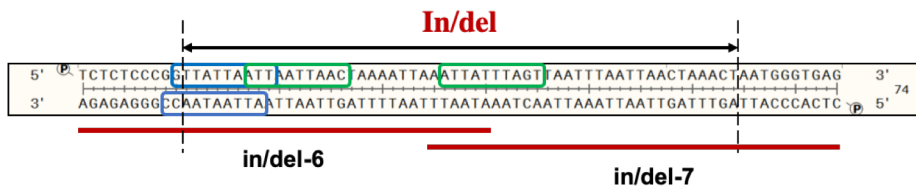

**Supplementary Figure 1. Linking *c-fos* transcription factor to in/del-6 and 7.** GTF2I binding site prediction by JASPAR (a) relative profile score threshold is 60% and their positions in the indel regions of ARMS2 genes (b). The binding sequence with the high relative score (blue) is located in the probe of in/del-6, and the sequence of lower score find in in/del-6 and in/del-7(green).

## Supplementary Figure 2

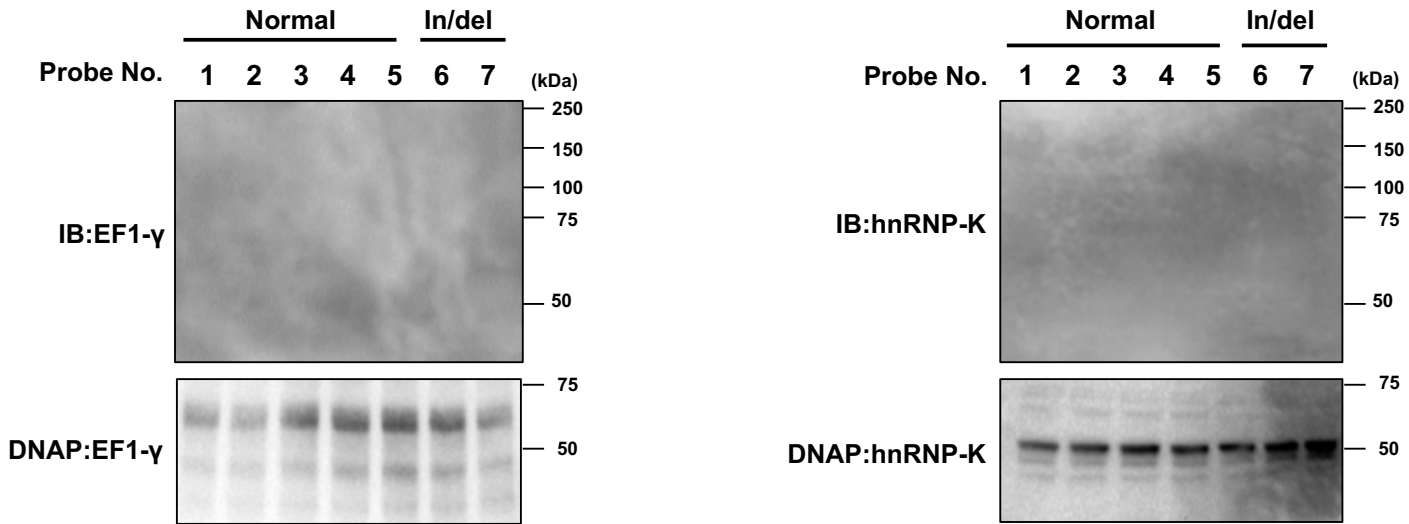

**Supplementary Figure 2. EF1/hnRNP-K with DNA probes binding test.** Neither of EF1 or hnRNP-K can be detected in any of DNA-protein precipitation by WB. DNAP of all probes was detected by anti-EF1 or anti-hnRNP-K antibody. Detection of Lamin A/C was used as an internal control (Figure 1c).

### Supplementary Figure 3

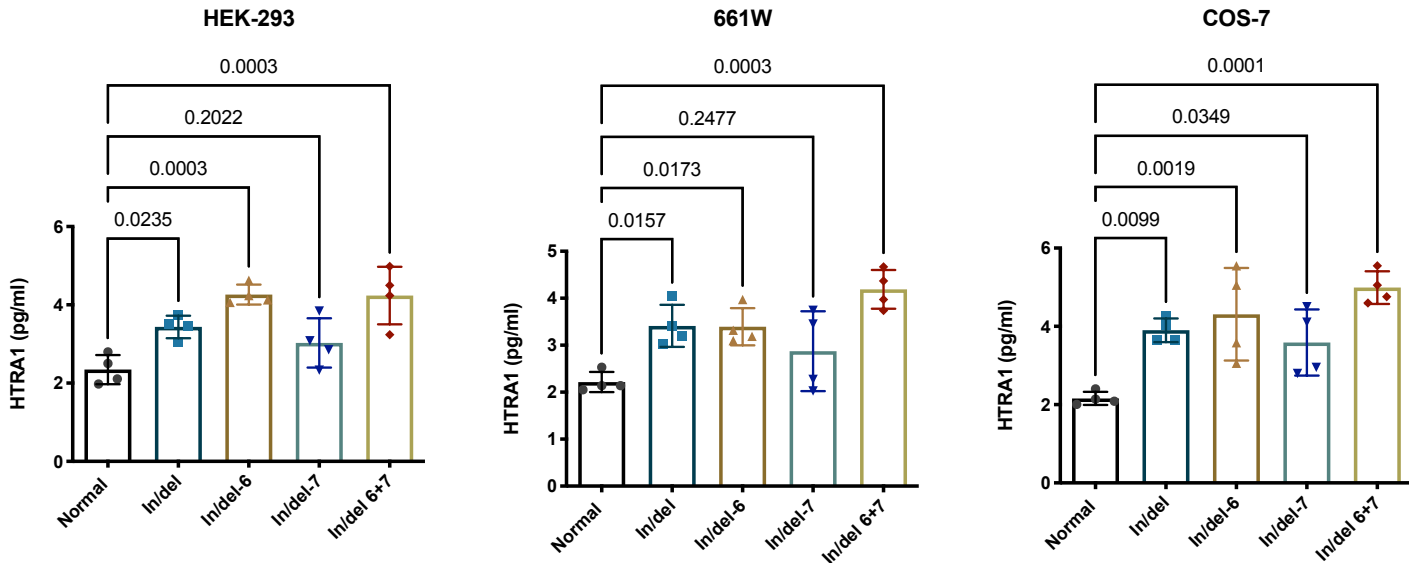

**Supplementary Figure 3. Secretion of HTRA1 in vitro.** Five kinds of expression vectors (normal, in/del, indel-6, indel-7 and co-indel-6/7) were transfected in HEK-293, 661W and COS-7 cells, respectively, and followed by ELISA. In/del and in/del-6 scientifically enhanced HTRA1 secretion in all cell lines. The results are expressed as the mean  $\pm$  SEM. The P value was obtained by Student's t-test.

# Supplementary Figure 4

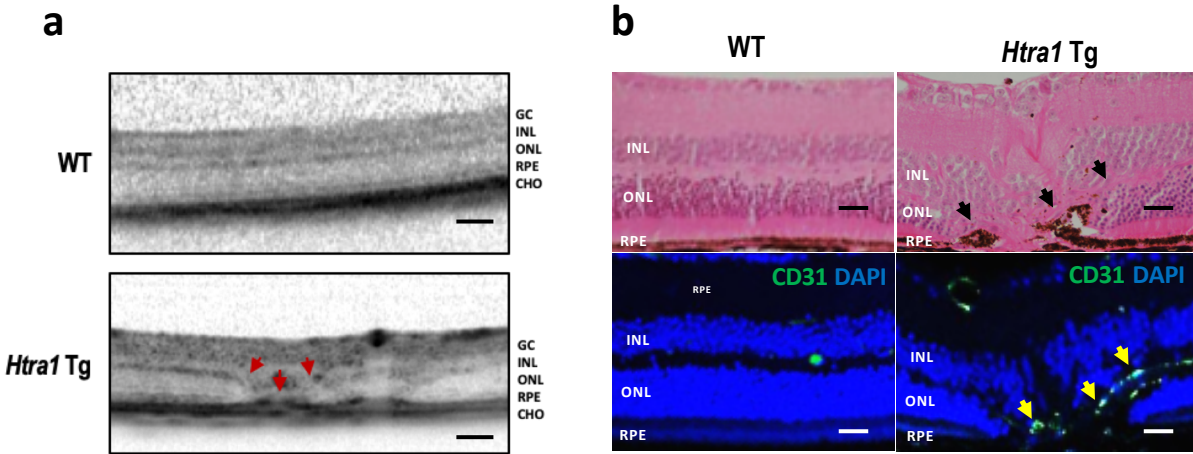

**Supplementary Figure 4. The *Htra 1* Tg mice developed CNV.** (a) The CNV was observed in the choroid and retina by OCT (red arrowheads; scale bar: 200  $\mu$ m) in one-year-old *Htra1* Tg mice. (b) The H&E staining of *Htra1* Tg mouse showed radial CNV spreading from the choroid through the RPE into the retina (black arrowheads;  $\times 40$  magnification; scale bars: 20  $\mu$ m). The endothelial cell marker CD31 was stained (green) in a radial CNV (yellow arrowheads; scale bars: 20  $\mu$ m). Nuclei were stained with DAPI (blue).

# Supplementary Figure 5

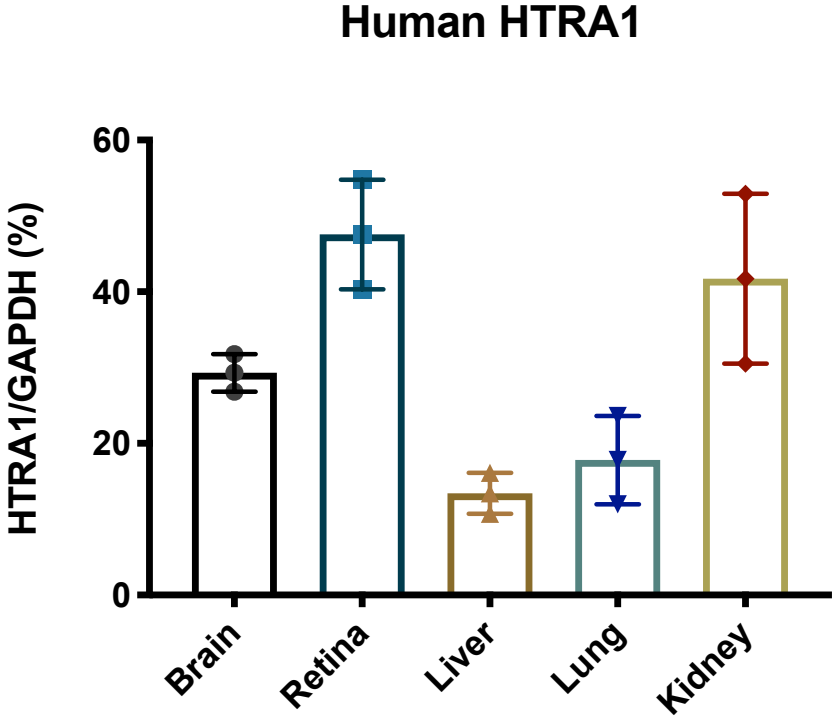

**Supplementary Figure 5. HTRA1 mRNA expression in human.** Quantitative real-time PCR determination of HTRA1 mRNA levels from cDNA library of human brain, retina, liver, lung and kidney. HTRA1 is ubiquitously expressed in all tissues and examined at very low levels. The results are expressed as the mean  $\pm$  SEM.

## Supplementary Figure 6

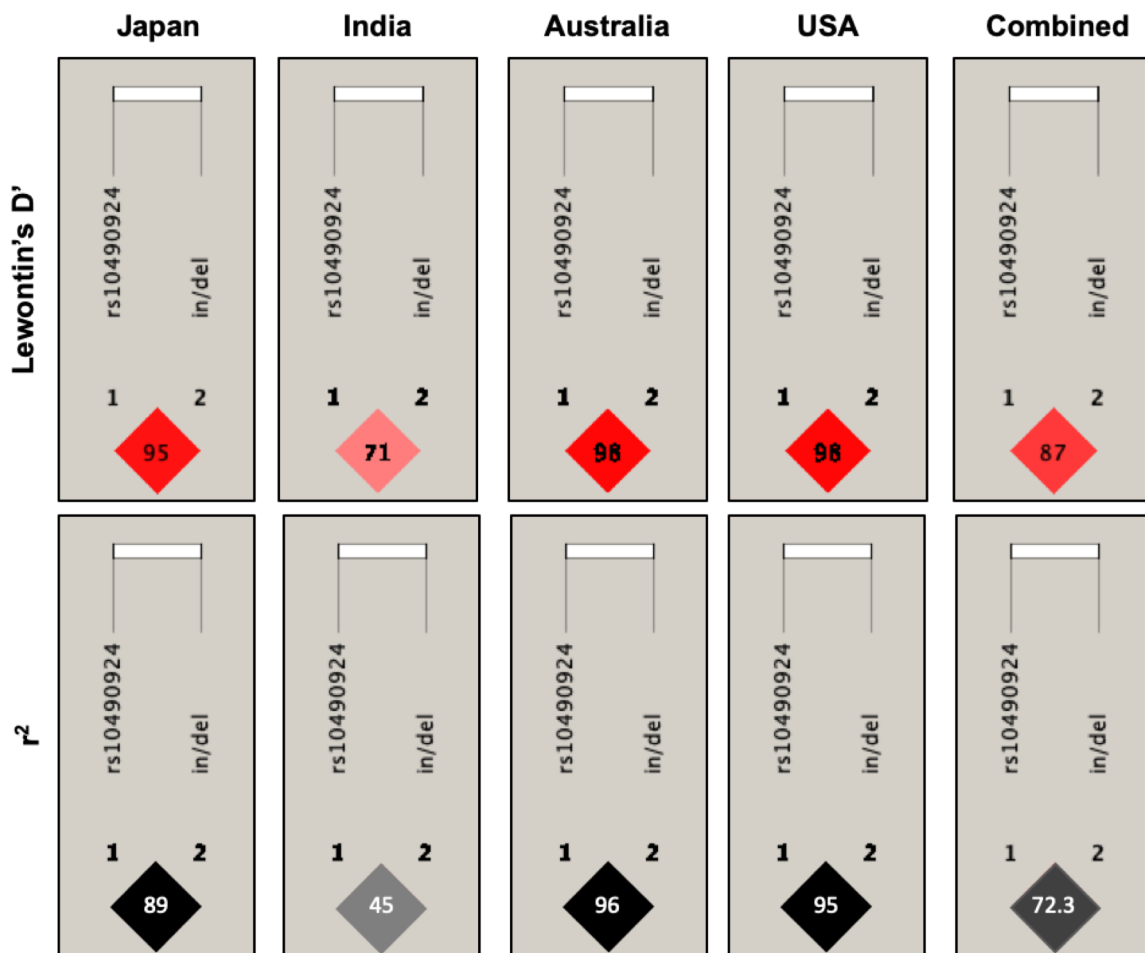

**Supplementary Figure 6. LD plots of the two variants (rs10490924 and in/del) in Japan, India, Australia, USA and combined samples. The D' and r<sup>2</sup> values between two SNPs are indicated inside the quadrants for each dataset, respectively.**

## Supplementary Figure 7

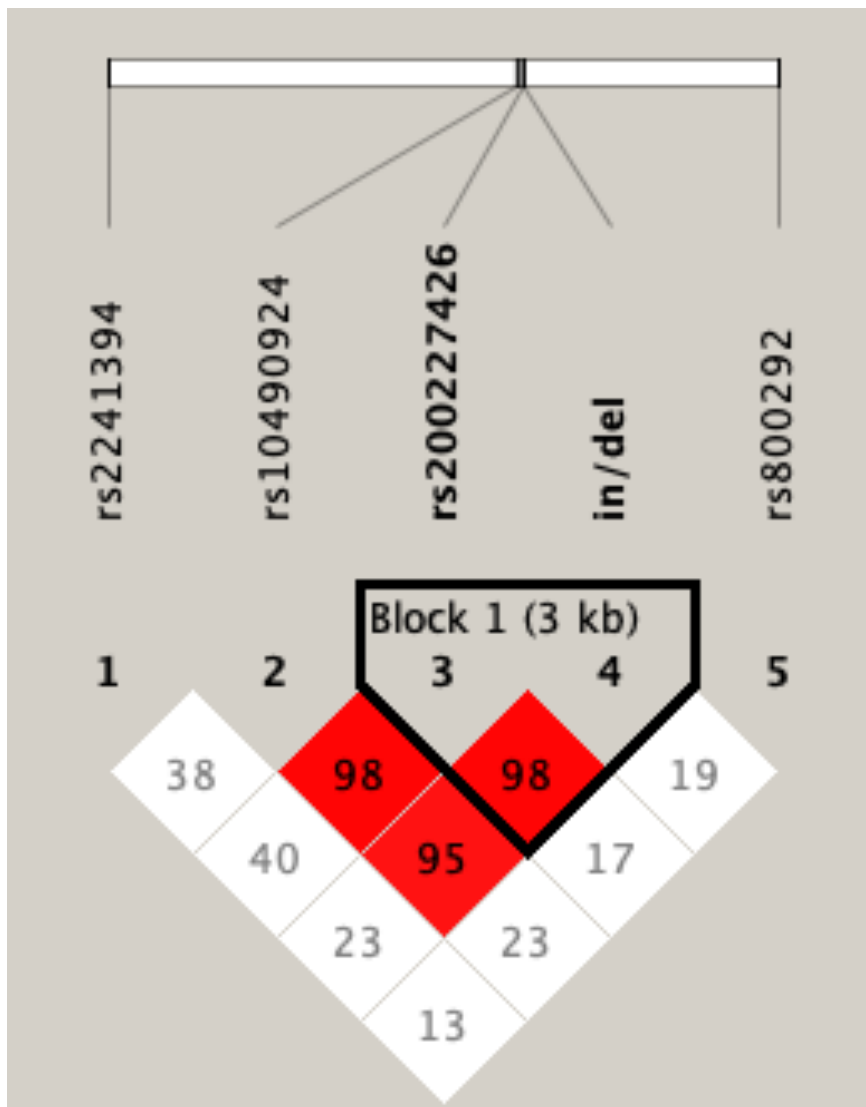

**Supplementary Figure 7. Linkage disequilibrium plots of the five variants (rs2241394, rs10490924, rs200227426, rs800292 and in/del) in Japan samples. The  $D'$  values between each SNPs are indicated inside the quadrants for the Japan samples.**



# Supplementary Figure 8

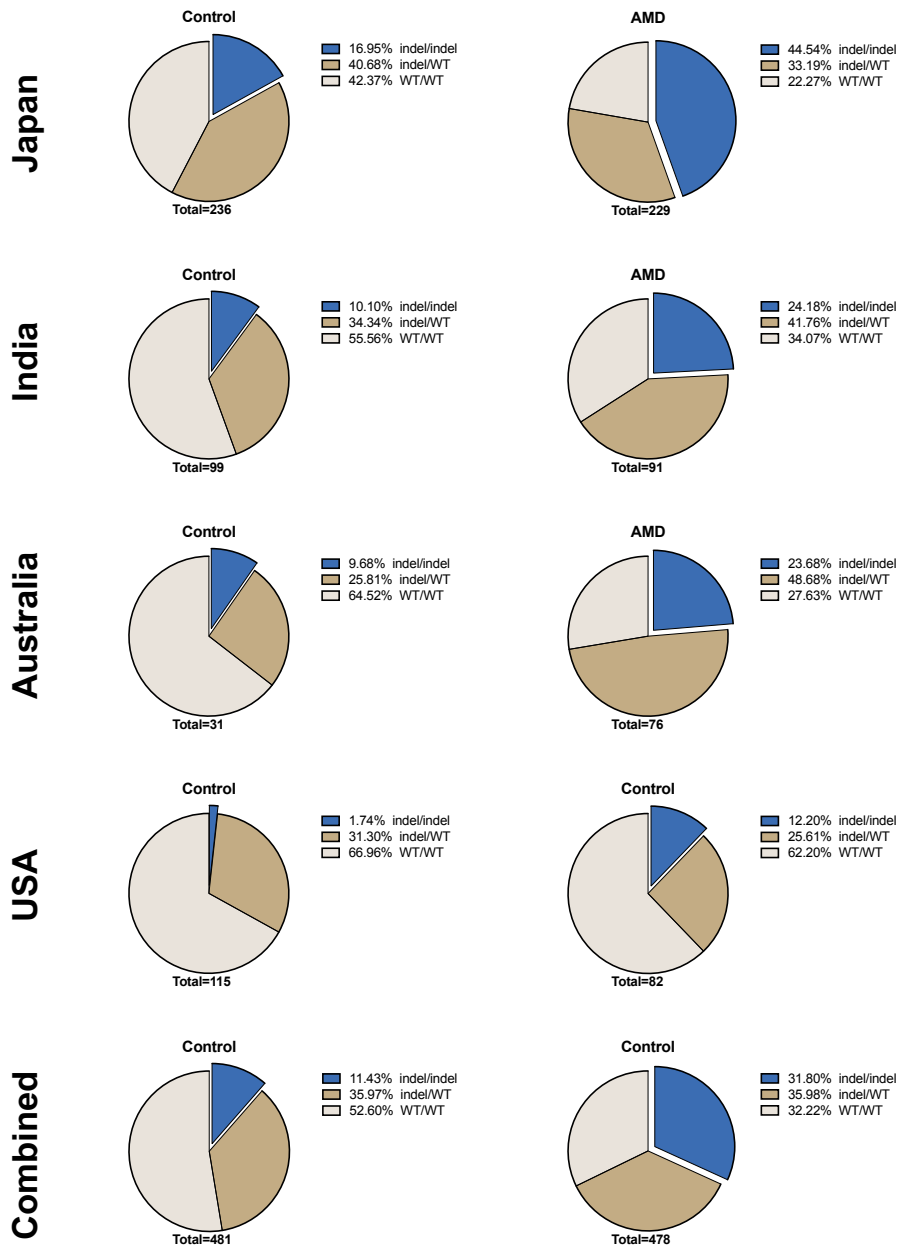

**Supplementary Figure 8. Genotypic distribution of in/del variant in controls and AMD patients.** The in/del fraction of total is computed for the Japan, India, Australia, USA and combined samples, respectively. The frequency of in/del is significantly higher in AMD samples comparing with controls.

# Supplementary Figure 9

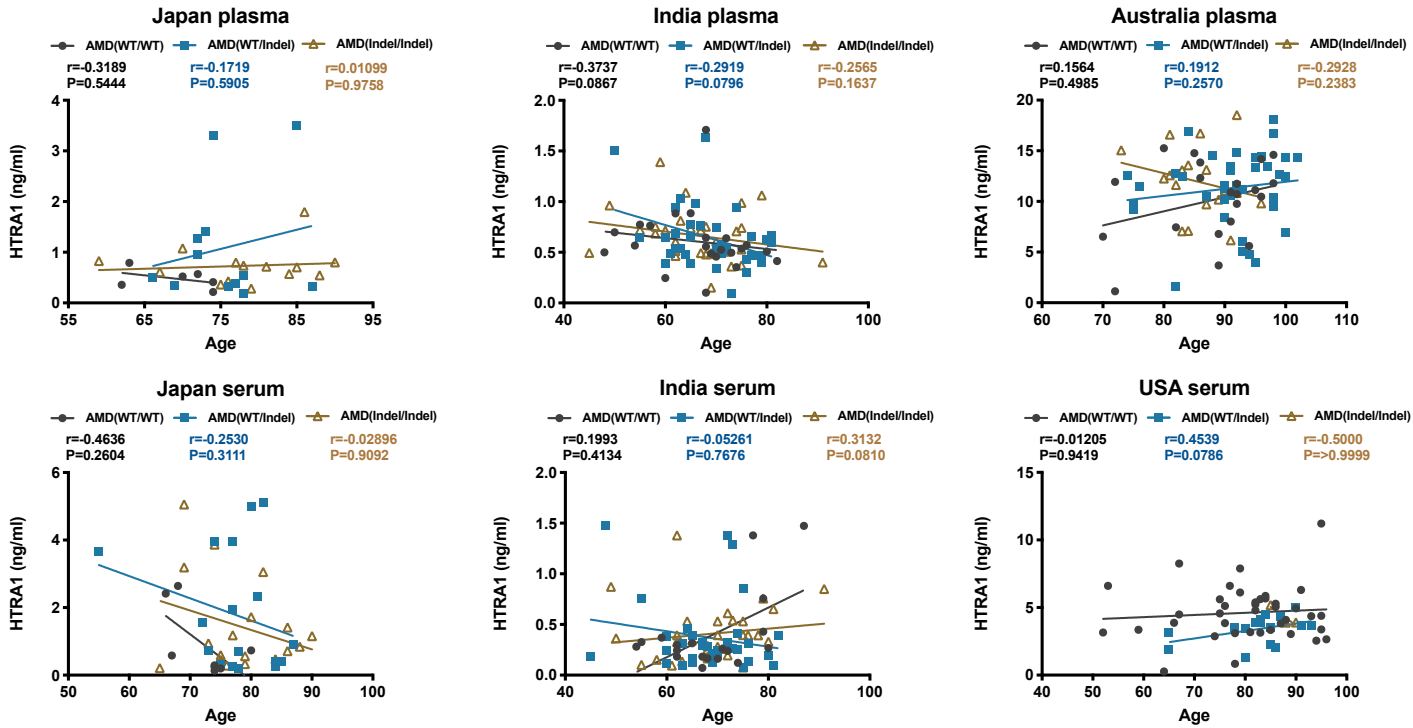

**Supplementary Figure 9. Correlation analysis of age and blood level of HTRA1 in AMD patients.** In all indel genotype AMD cases from each country, no correlation was found between blood concentration of HTRA1 and age. Data are presented as scatter plots. The linear regression equations are solid, straight lines. The correlation coefficient (r) and *P* (two tailed) values were obtained using linear regression (Pearson's) analysis.

# Supplementary Table 3

Supplementary Table 4. Results from a two-way ANOVA showing main effects and interaction of the genotype effects to HTRA1 concentration in blood samples.

|           | Source of Variation  |               |                      |          | ANOVA table |             |             |              | Number of missing values |                    |                    |            |     |
|-----------|----------------------|---------------|----------------------|----------|-------------|-------------|-------------|--------------|--------------------------|--------------------|--------------------|------------|-----|
|           | % of total variation | P value       | Significance summary | nt       | SS          | DF          | MS          | F (DFn, DFd) |                          | P value            |                    |            |     |
| Japan     | Plasma               | Interaction   | 11.93                | < 0.0001 | ****        | Yes         | Interaction | 1.40E+06     | 2                        | 699378             | F (2, 67) = 48.36  | P < 0.0001 | 35  |
|           |                      | Row Factor    | 16.24                | < 0.0001 | ****        | Yes         | Genotype    | 1.90E+06     | 2                        | 952164             | F (2, 67) = 65.84  | P < 0.0001 |     |
|           |                      | Column Factor | 63.57                | < 0.0001 | ****        | Yes         | Phenotype   | 7.46E+06     | 1                        | 7.46E+06           | F (1, 67) = 515.5  | P < 0.0001 |     |
|           |                      |               |                      |          |             | Residual    | 968990      | 67           | 14463                    |                    |                    |            |     |
| Serum     | Interaction          | 11.93         | < 0.0001             | ****     | Yes         | Interaction | 1.40E+06    | 2            | 699378                   | F (2, 67) = 48.36  | P < 0.0001         | 35         |     |
|           | Row Factor           | 16.24         | < 0.0001             | ****     | Yes         | Genotype    | 1.90E+06    | 2            | 952164                   | F (2, 67) = 65.84  | P < 0.0001         |            |     |
|           | Column Factor        | 63.57         | < 0.0001             | ****     | Yes         | Phenotype   | 7.46E+06    | 1            | 7.46E+06                 | F (1, 67) = 515.5  | P < 0.0001         |            |     |
|           |                      |               |                      |          |             | Residual    | 968990      | 67           | 14463                    |                    |                    |            |     |
| India     | Plasma               | Interaction   | 2.158                | 0.001    | ***         | Yes         | Interaction | 22551        | 2                        | 11276              | F (2, 161) = 7.220 | P = 0.0010 | 103 |
|           | Row Factor           | 17.74         | < 0.0001             | ****     | Yes         | Genotype    | 185354      | 2            | 92677                    | F (2, 161) = 59.34 | P < 0.0001         |            |     |
|           | Column Factor        | 56.04         | < 0.0001             | ****     | Yes         | Phenotype   | 585637      | 1            | 585637                   | F (1, 161) = 375.0 | P < 0.0001         |            |     |
|           |                      |               |                      |          |             | Residual    | 251452      | 161          | 1562                     |                    |                    |            |     |
| Serum     | Interaction          | 1.363         | 0.0437               | *        | Yes         | Interaction | 773.7       | 2            | 386.9                    | F (2, 161) = 3.192 | P = 0.0437         | 103        |     |
|           | Row Factor           | 5.695         | < 0.0001             | ****     | Yes         | Genotype    | 3233        | 2            | 1616                     | F (2, 161) = 13.34 | P < 0.0001         |            |     |
|           | Column Factor        | 58.56         | < 0.0001             | ****     | Yes         | Phenotype   | 33240       | 1            | 33240                    | F (1, 161) = 274.3 | P < 0.0001         |            |     |
|           |                      |               |                      |          |             | Residual    | 19513       | 161          | 121.2                    |                    |                    |            |     |
| Australia | Plasma               | Interaction   | 1.627                | < 0.0001 | ****        | Yes         | Interaction | 3.779        | 2                        | 1.89               | F (2, 101) = 13.95 | P < 0.0001 | 115 |
|           | Row Factor           | 16.08         | < 0.0001             | ****     | Yes         | Genotype    | 37.34       | 2            | 18.67                    | F (2, 101) = 137.9 | P < 0.0001         |            |     |
|           | Column Factor        | 76.41         | < 0.0001             | ****     | Yes         | Phenotype   | 177.5       | 1            | 177.5                    | F (1, 101) = 1311  | P < 0.0001         |            |     |
|           |                      |               |                      |          |             | Residual    | 13.68       | 101          | 0.1354                   |                    |                    |            |     |
| USA       | Serum                | Interaction   | 0.5205               | 0.0475   | *           | Yes         | Interaction | 0.2049       | 2                        | 0.1025             | F (2, 149) = 3.111 | P = 0.0475 | 139 |
|           | Row Factor           | 85.03         | < 0.0001             | ****     | Yes         | Genotype    | 33.48       | 2            | 16.74                    | F (2, 149) = 508.2 | P < 0.0001         |            |     |
|           | Column Factor        | 1.984         | < 0.0001             | ****     | Yes         | Phenotype   | 0.7813      | 1            | 0.7813                   | F (1, 149) = 23.72 | P < 0.0001         |            |     |
|           |                      |               |                      |          |             | Residual    | 4.907       | 149          | 0.03294                  |                    |                    |            |     |

# Supplementary Table 4

**Supplementary Table 4. List of primers used in the study**

|                                 | <b>Primer name</b>                    | <b>Sequence</b>                         |
|---------------------------------|---------------------------------------|-----------------------------------------|
| Quantitative<br>real-time PCR   | mouse HtrA1 forward                   | GATTGACCACCAGGGAAAAGC                   |
|                                 | mouse HtrA1 reverse                   | TTCCGAAGTCCCAGCTCTTT                    |
|                                 | mouse GAPDH forward                   | GTTGTCTCCTGCGACTTCA                     |
|                                 | mouse GAPDH reverse                   | GGTGGTCCAGGGTTTCTTA                     |
|                                 | human HTRA1 forward                   | GTGGATGACG GATGAGGACT                   |
|                                 | human HTRA1 reverse                   | AGGATACAGAAGGGCAGAGC                    |
|                                 | mouse VEGF120 forward                 | GCCAGCACATAGGAGAGATGAGC                 |
|                                 | mouse VEGF120 reverse                 | CGGCTTGTACATTTTTCTGG                    |
|                                 | mouse VEGF164 forward                 | GCCAGCACATAGGAGAGATGAGC                 |
|                                 | mouse VEGF164 reverse                 | CAAGGCTCACAGTGATTTTCTGG                 |
|                                 | mouse VEGF188 forward                 | GCCAGCACATAGGAGAGATGAGC                 |
|                                 | mouse VEGF188 reverse                 | AACAAGGCTCACAGTGAACGCT                  |
|                                 | human GAPDH forward                   | GGATTTGGTCGTATTGGG                      |
|                                 | human GAPDH reverse                   | GGAAGATGGTGATGGGATT                     |
| Plasmid<br>construction         | mouse HtrA1normal forward             | ACGTCTCGAGGCCTCGCAGCGGTGACGAG           |
|                                 | mouse HtrA1 normal reverse            | ACGTGAGCTCAGATGCAGCCCAATCTTCTCCTAACA    |
|                                 | mouse in/del forward                  | ACGTCTCGAGGCCTCGCAGCGGTGACGAG           |
|                                 | mouse in/del reverse                  | ACGTGAGCTCAGATGCAGCCCAATCTTCTCCTAACA    |
|                                 | human HTRA1-myc forward               | ATGCACCGTTGAGAGACACAAAAAATCCAAC         |
|                                 | human HTRA1-myc reverse               | ATGCGTCGACGTACAAGAAAGCTGGGCCATGAGGCCT   |
|                                 | mouse Gtf2i-Flag forward (EcoRI)      | ATGCGAATTCATGGCCCAAGTAGTGATGTCTGCCTTGCC |
| mouse Gtf2i-flag reverse (XbaI) | ATGCTCTAGACCACGTGGGGTCTGGCTCCTGCTTGAT |                                         |
| Gtf2i isoform<br>identification | mouse Gtf2i isoform-F (TA cloning)    | ATTCTGGCATTCTCTGAAATGGCCGC              |
|                                 | mouse Gtf2i isoform-F-A               | AAAAGCTCCCCCTTTTGAAGGCTTTGCA            |
|                                 | mouse Gtf2i isoform-F-B               | TCAGAAAGGCAACGAGGGAAACGGAAGTGG          |
|                                 | mouse Gtf2i isoform F-C               | GTCCCTTCAGAAACCAAGTGAGGACCCCG           |
|                                 | mouse Gtf2i isoform-R                 | TCCCAAGGCCTCGGCAAATTTCTTGCA             |
| Sequencing                      | Gtf2i-sequenceing-1                   | ATGGACTACAAAGACCATGACGGT                |
|                                 | Gtf2i-sequenceing-2                   | ATGGCCCAAGTAGTGATGTCTGCCT               |
|                                 | Gtf2i-sequenceing-3                   | GGTCCCTGTGCCATATGAGAAGATG               |
|                                 | Gtf2i-sequenceing-4                   | TGACTATTCTCCACCCACCAAGAGG               |
|                                 | Gtf2i-sequenceing-5                   | GATGGTTGACCAGCTCTTCTGCAAG               |
|                                 | Gtf2i-sequenceing-6                   | GAGAGGATTGCCGTGGCAGCAATA                |
|                                 | Gtf2i-sequenceing-7                   | CTGAGATGTTTCGAGACGGCCA                  |
|                                 | Gtf2i-sequenceing-8                   | GTCCCTCAAAGCCCCCAGTTACCTG               |
|                                 | Gtf2i-sequenceing-9                   | CTACCACGTGGGGTCTGGCT                    |
|                                 | Gtf2i-sequenceing-10                  | CAGGTAACCTGGGGGCTTTGAAGGAC              |
|                                 | Gtf2i-sequenceing-11                  | TGGCCGTCTCGAACATCTCAG                   |
|                                 | Gtf2i-sequenceing-12                  | TATTGCTGCCACGGACAATCCTCTC               |
|                                 | Gtf2i-sequenceing-13                  | CTTGCCAGAAGAGCTGGTCAACCATC              |
|                                 | Gtf2i-sequenceing-14                  | CCTCTTGGTGGGTGGAGAATAGTCA               |
|                                 | Gtf2i-sequenceing-15                  | CATCTTCTCATATGGCACAGGGACC               |

## Supplementary Table 5

Supplementary Table 5. EMSA probe sequence

| No. | Name     | Sequence                                  | Antisense                                  |
|-----|----------|-------------------------------------------|--------------------------------------------|
|     |          | Sense                                     |                                            |
| 1   | Normal-1 | GGTGTAACCTGCTGTTAAAGGAGGTTACGACCTCTGATGCT | AGCATCAGAGGTCGTAACCTCCTTTAACAGCAGGTACACC   |
| 2   | Normal-2 | ATGCTGGGGTGGCCAGAGGGGATGGGAGTGGGTCTGGCAC  | GTGCCAGACCCCACTCCCATCCCTCTGGCCACCCCCAGCAT  |
| 3   | Normal-3 | GGCACTCTGAGGAAAGGGGGTGAACCAGCTGAGAAGTCA   | TGACTTCTCAGCTGGTTTCACCCCTTTCTCAGAGTGCC     |
| 4   | Normal-4 | GGCACTCTGAGGAAAGGGGGTGAACCAGCTGAGAAGTCA   | GAACCCCTGGCTGGGGCCATGCCAGCAGGTAAAAAGATGACT |
| 5   | Normal-5 | GGCACTCTGAGGAAAGGGGGTGAACCAGCTGAGAAGTCA   | ACTCACCCATTCTCCCATAGCAACAGAACCCCTGGCTGGGG  |
| 6   | In/del-6 | GGCACTCTGAGGAAAGGGGGTGAACCAGCTGAGAAGTCA   | ATAATTTAATTTTAGTTAATTAATTAATTAACCCGGGAGAGA |
| 7   | In/del-7 | AATTATTTAGTTAATTTAATTAACCTAAACTAATGGGTGAG | CTCACCCATTAGTTTAGTTAATTAATTAACCTAAATAATT   |

**Fig. 1 c**

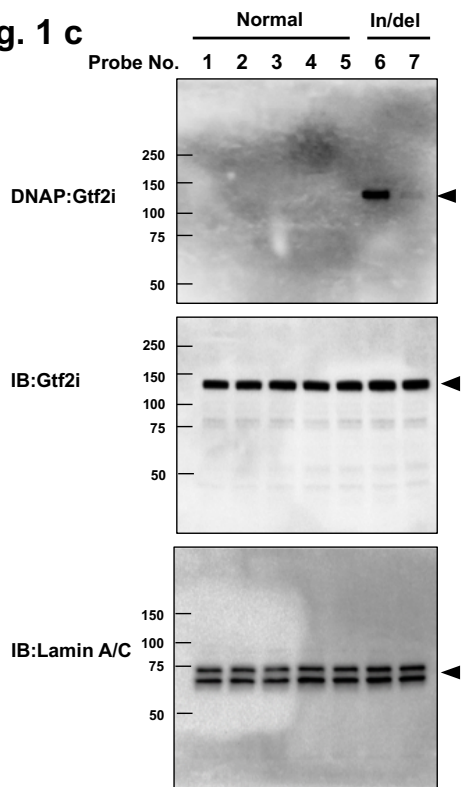

**Fig. 1 g**

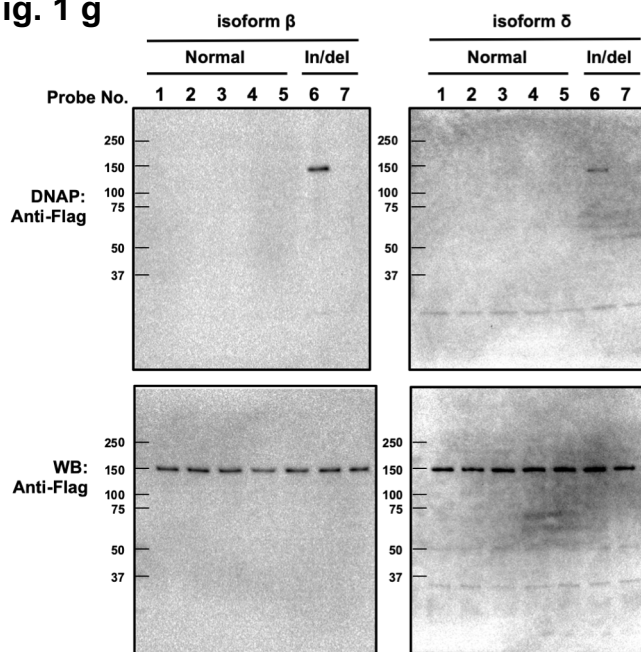

**Fig. 1 h**

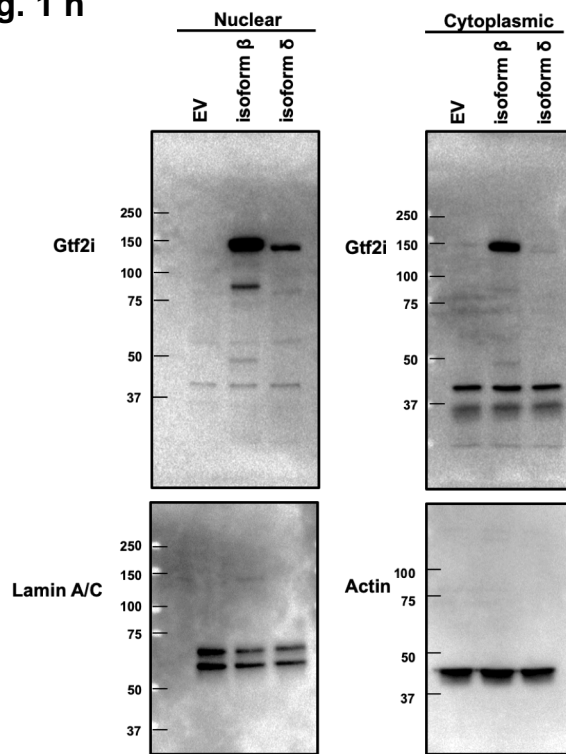

**Fig. 2 c**

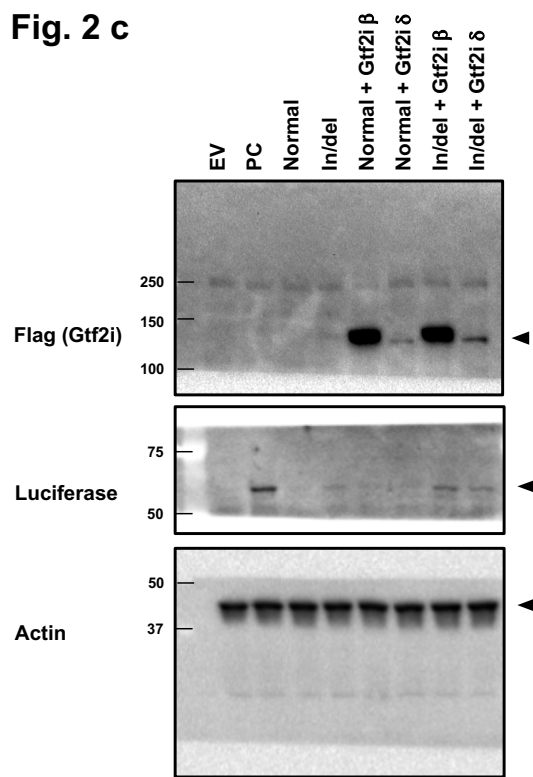

Fig. 5 a

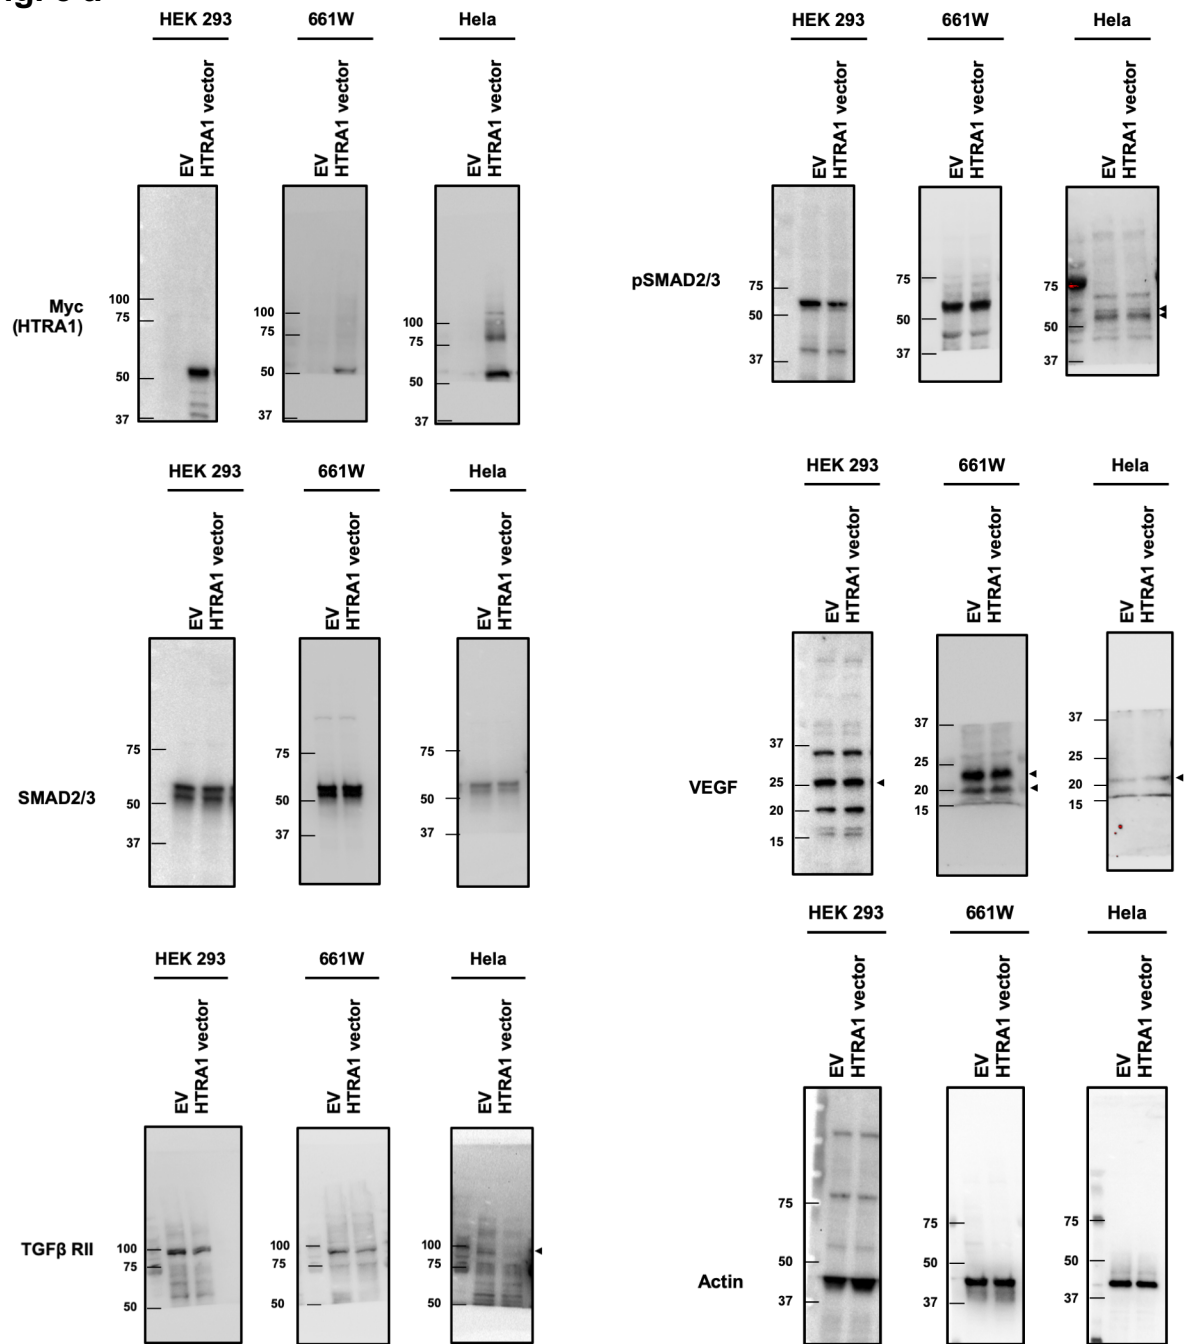

Fig. 5 c

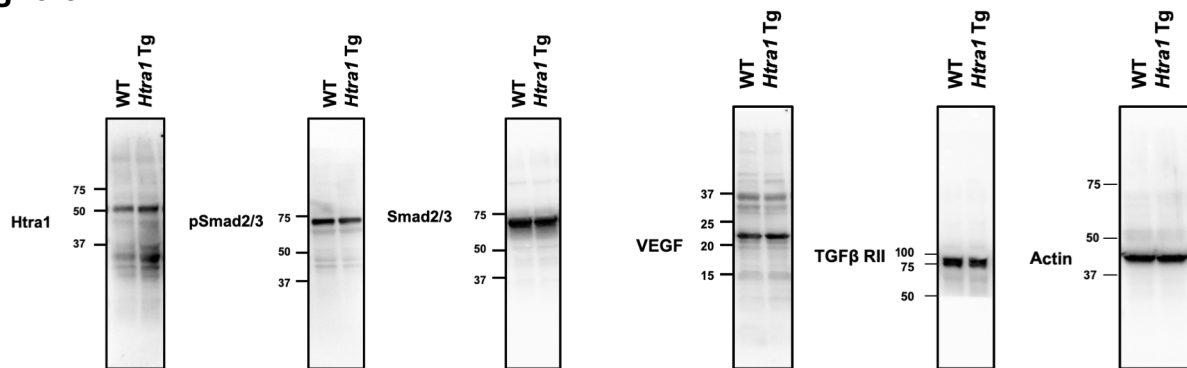

Supplement: mmc1.pdf [file mmc1.pdf]
